# Supplementary material for: Window Area and Development Drive Spatial Variation in Bird-Window Collisions in an Urban Landscape
Source: PLOS journal article supplement (doi:10.1371/journal.pone.0053371), 2013-01-09

Figure S1. Relationship between carcass observability and mean ( $\pm 1$  SE) detection probability of carcasses for two field workers at 20 buildings.

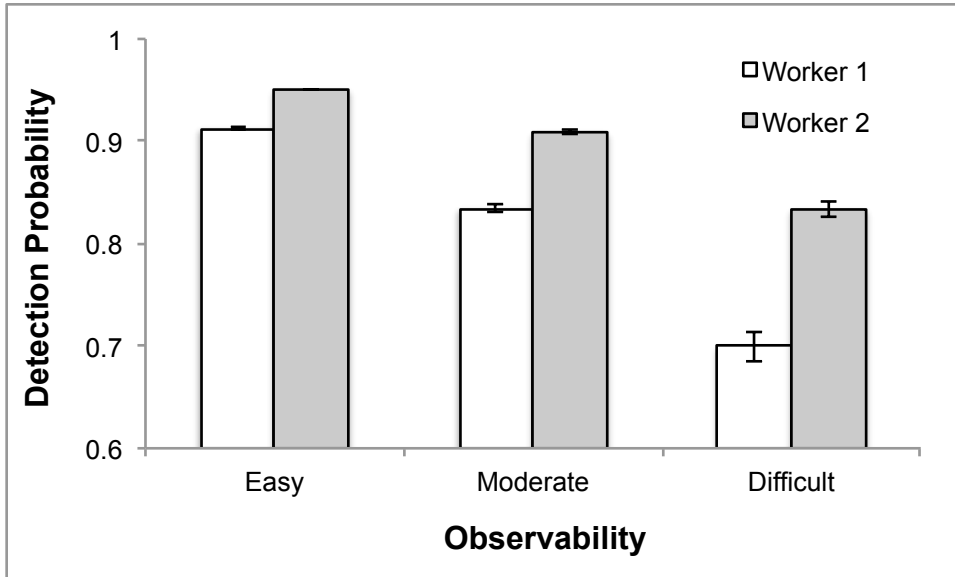

Supplement: S1 (10.1371/journal.pone.0053371.s001) [file journal.pone.0053371.s001]
