# Supplementary material for: Window Area and Development Drive Spatial Variation in Bird-Window Collisions in an Urban Landscape
Source: PLOS journal article supplement (doi:10.1371/journal.pone.0053371), 2013-01-09
Supplement: S2 (10.1371/journal.pone.0053371.s002) [file journal.pone.0053371.s002]

**Table S1. Most-supported models of carcass detection probability at 20 buildings in an urban landscape in Illinois, USA, 2010.**

| Model       | $\Delta AIC_C$ | $\omega_j$ | $-2l$ | K |
|-------------|----------------|------------|-------|---|
| O           | 0.00           | 0.30       | 80.18 | 3 |
| O + W       | 0.04           | 0.29       | 77.05 | 4 |
| O + W + O*W | 2.70           | 0.08       | 76.09 | 5 |
| W           | 2.77           | 0.07       | 82.95 | 3 |
| O + N       | 2.80           | 0.07       | 79.81 | 4 |
| Intercepts  | 2.98           | 0.07       | 85.95 | 2 |
| O + W + N   | 3.50           | 0.05       | 76.89 | 5 |
| N + W + N*W | 4.88           | 0.03       | 78.27 | 5 |
| N           | 5.23           | 0.02       | 85.41 | 3 |
| N + W       | 5.38           | 0.02       | 82.39 | 4 |

Main effects include carcass observability (O), individual field worker (W), and survey order (N). Summary includes the relative difference between model  $AIC_C$  and the best model ( $\Delta AIC_C$ ), Akaike weights ( $\omega_j$ ), twice the negative log-likelihood ( $-2l$ ), and number of parameters estimated (K). The overall model-averaged detection probability was 0.88 (SE = 0.01). Detection probability was related to carcass observability and field worker (see Fig. S1).
